# Supplementary material
Source: PubMed Central journal article supplement (PMC3271755)
Supplement: supp_pp.111.188870_188870SupplementalMaterial.pdf [file supp_pp.111.188870_188870SupplementalMaterial.pdf]

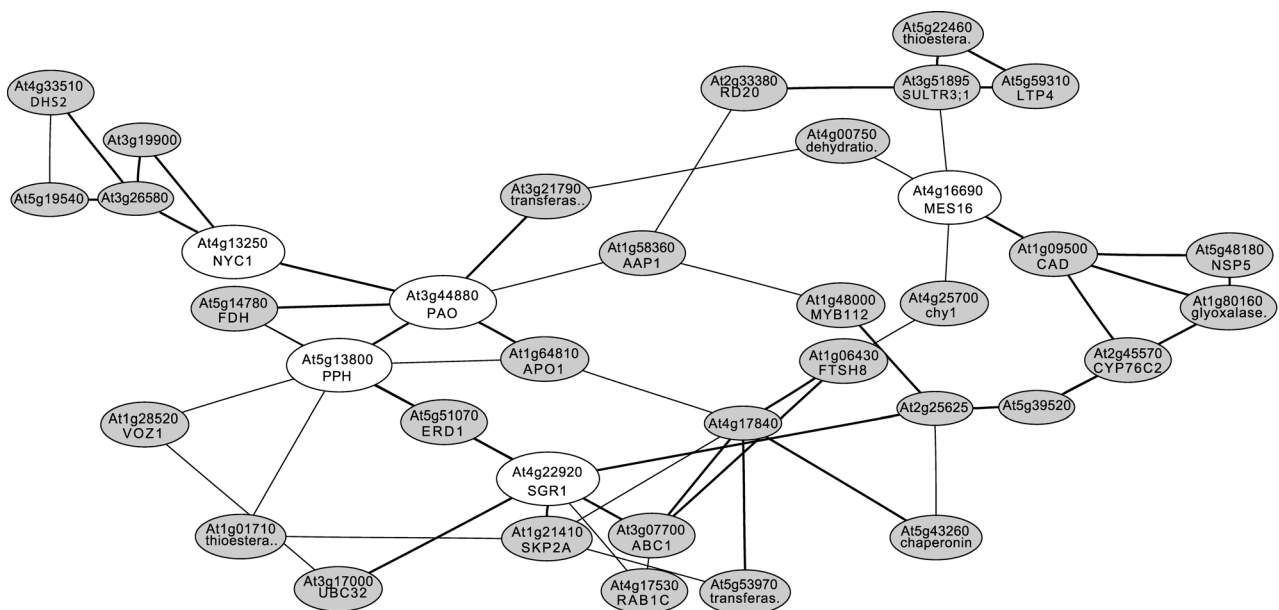

**Supplemental Figure S1.** Co-expression network around *PAO*, *PPH*, *SGR*, *NYC1* and *MES16*. The ATTED-II NetworkDrawer tool (Obayashi et al., 2009) was used to generate the network with *PAO* (AT3G44880), *PPH* (AT5G13800), *SGR* (AT4G22920), *NYC1* (AT4G13250) and *MES16* (AT4G16690) as inputs.

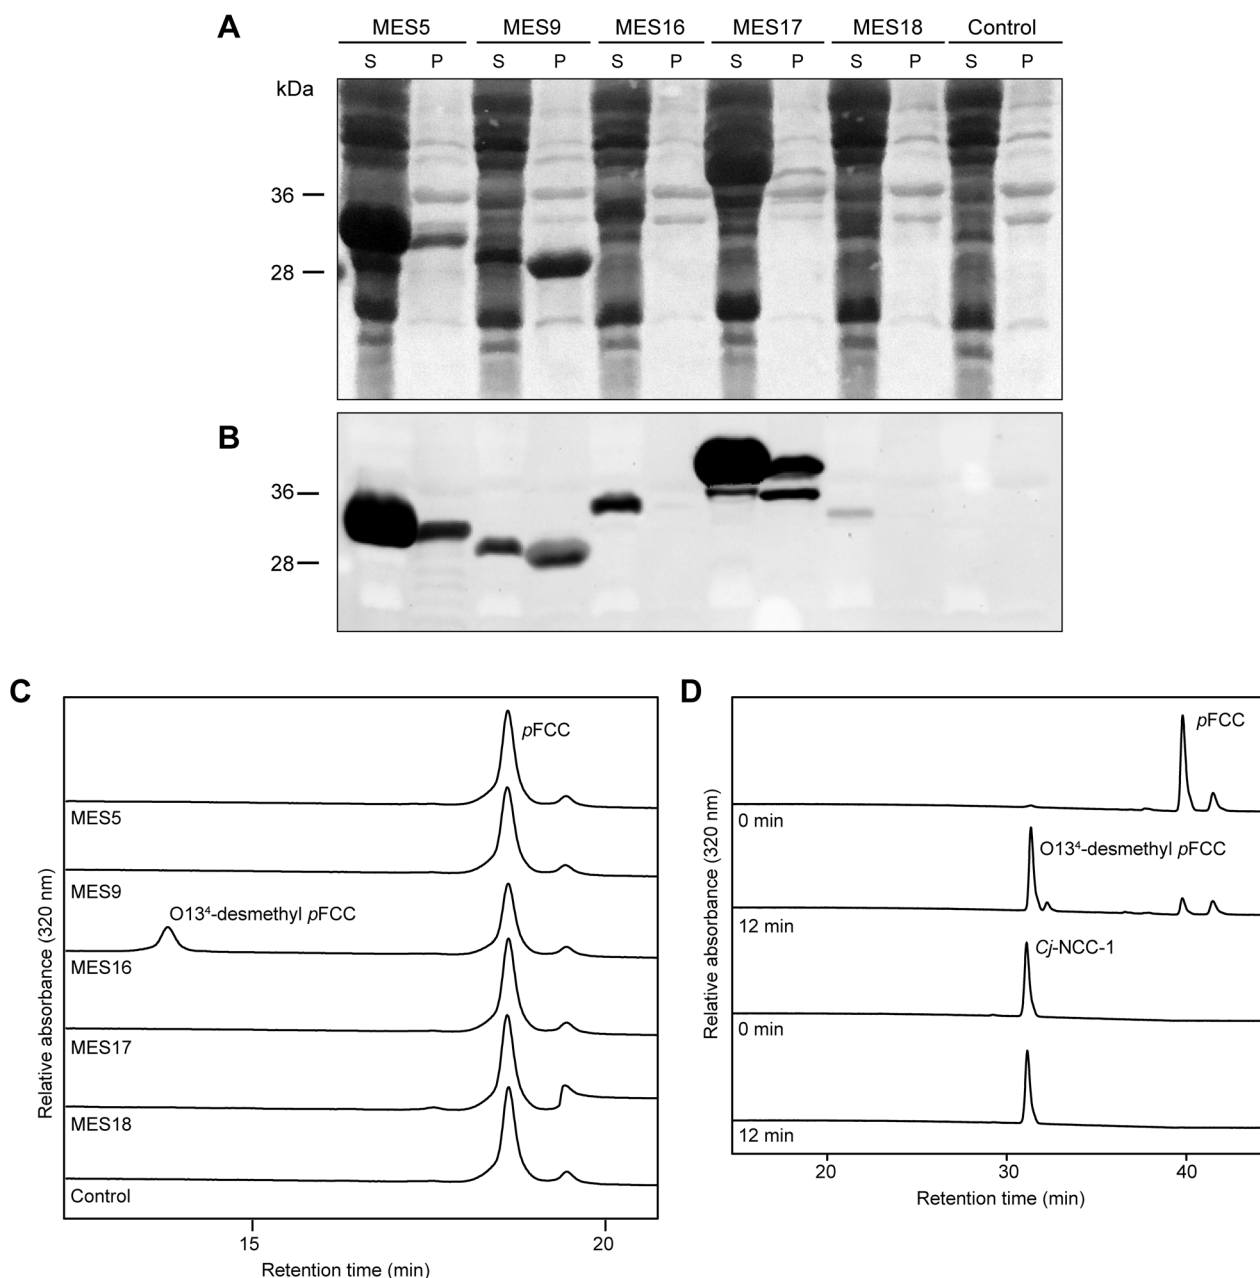

**Supplemental Figure S2.** Analysis of recombinant MES5, MES9, MES16, MES17 and MES18. A, Analysis of MES protein expression by SDS-PAGE followed by transfer to a nitrocellulose membrane and Ponceau S staining. Soluble (S) and insoluble (P) proteins from equal cellular fractions were loaded in the gel. B, Detection of recombinant MES proteins by anti-His immunoblotting of the membrane showed in panel A. As control, an *E. coli* strain containing the empty vector was used. C, HPLC analysis of assays employing *E. coli* lysates expressing 6xHis-MES proteins with pFCC as substrate. Equivalent amount of recombinant proteins were used in the assays. Parts of HPLC traces at  $A_{320}$  after 12 min of incubation at 25°C are shown. D, Analysis of MES16 activity on C<sub>j</sub>-NCC-1. Parts of HPLC traces at  $A_{320}$  after 0 and 12 min of incubation at 25°C are shown. pFCC was used as control. Note that the assays shown in panel D were analyzed by HPLC using the program described for plant extracts (see Materials and Methods).

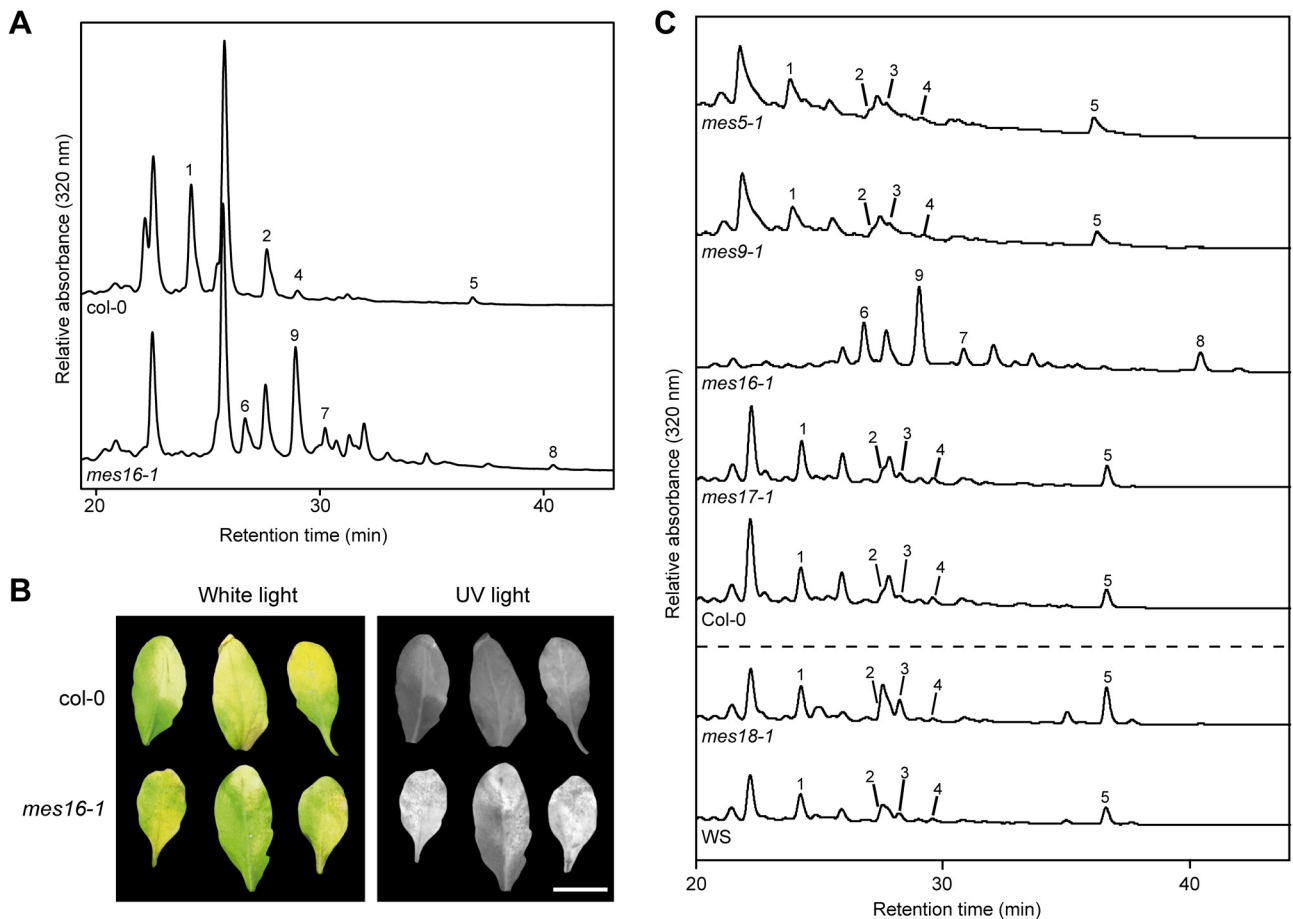

**Supplemental Figure S3.** Colorless catabolites occurring in *mes16-1* mutants during natural senescence and in mutants of other closely related MES family members after dark incubation. A, HPLC analysis of colorless catabolites of senescent leaves of Col-0 and *mes16-1* during natural senescence. B, Photographs of natural senescent Col-0 and *mes16-1* leaves under white light and UV light (366 nm). Bar = 1 cm. C, Colorless catabolites of *mes5-1*, *-9-1*, *-16-1*, *-17-1* and *-18-1* mutants after dark incubation (8 d for *mes5-1*, *-9-1*, *-16-1*, *-17-1*, background Col-0; 10 d for *mes18-1*, background WS). A and C, Catabolites were separated by HPLC as described in Materials and Methods.  $A_{320}$  was recorded. For clarity, only parts of the HPLC traces are shown in panels A and C. For identification and peak numbering of FCCs and NCCs see Table I.

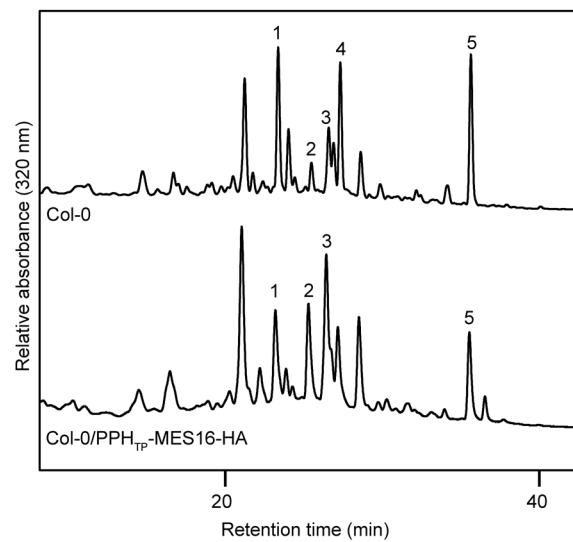

**Supplemental Figure S4.** Colorless catabolites of Col-0/PPH<sub>TP</sub>-MES16-HA. Colorless catabolites of dark-incubated (6 d) leaves of Col-0 and Col-0/PPH<sub>TP</sub>-MES16-HA plants were separated by HPLC as described in Materials and Methods. For clarity, only a part of the HPLC traces at  $A_{320}$  is shown. For identification and peak numbering of FCCs and NCCs, see Table I.

**Supplemental Table S1** : List of primers used in this study.

| Gene/construct/<br>mutant                | Primer name   | Sequence (5'→3')                                               |
|------------------------------------------|---------------|----------------------------------------------------------------|
| <i>T-DNA confirmation</i>                |               |                                                                |
| <i>mes16-1</i>                           | MES16-1-RP    | GTTGAAGAAAAGAAACCGCAC                                          |
|                                          | MES16-1-LP    | CTGAGCCCGTAATTCACCTTG                                          |
| <i>mes16-2</i>                           | MES16-2-RP    | ACCTCATGTTGTCGTTCAAGG                                          |
|                                          | MES16-2-LP    | CTAACATCGTCTTCGACTCCG                                          |
| <i>mes5-1</i>                            | MES5-1-RP     | TCATGAAGGCACGTCTTTACC                                          |
|                                          | MES5-1-LP     | TTTTGTCTCACCTGCTTCCAC                                          |
| <i>mes9-1</i>                            | MES9-1-RP     | GTTTGACCTGTACCAGCACC                                           |
|                                          | MES9-1-LP     | CTTTGGAGGATTTTCGCTAAGC                                         |
| <i>mes17-1</i>                           | MES17-1-RP    | CGAGTGCGATACAGAGATTCC                                          |
|                                          | MES17-1-LP    | AAAACCAACAAAAGGCAATCC                                          |
| <i>mes18-1</i>                           | MES18-1-RP    | TTGTTGGGAGATTTTGTGGTC                                          |
|                                          | MES18-1-LP    | TTTCATGAAGTTGTCAACACCTG                                        |
| <i>pao1</i>                              | N14-RP        | GGCTCACCTGACGCTTGTTA                                           |
|                                          | N14-LP        | CGACGGTGACAATTCAAAGGG                                          |
| SALK T-DNA                               | LBb1.3        | ATTTTGCCGATTTTCGGAAC                                           |
| SAIL T-DNA                               | LB2           | GCTTCCTATTATATCTTCCCAAATTACCAATACA                             |
| GABI T-DNA                               | GABI-LB       | CCCATTGGACGTGAATGTAGACAC                                       |
| FLAG T-DNA                               | FLAG_LB_TAG5  | CTACAAATTGCCTTTTCTTATCGAC                                      |
| <i>RT-PCR</i>                            |               |                                                                |
| <i>MES16</i>                             | MES16_Ex1_S   | TCACCGAAGCTCTTTGCAAG                                           |
|                                          | MES16_Ex3_AS  | TTGAAGAAAAGAAACCGCACG                                          |
| <i>ACT2</i>                              | ACT2-S        | TGGAATCCACGAGACAACCTA                                          |
|                                          | ACT2-AS       | TTCTGTGAACGATTCTGGAC                                           |
| <i>SGR1</i>                              | AtSGR1-S      | TGGAGATGGGAAGTTGTTGAA                                          |
|                                          | AtSGR1-AS     | GCTAACGGTTGGAAAACAACA                                          |
| <i>PAO</i>                               | ACD1-S        | ACGGCATGGTAAGAGTCAGC                                           |
|                                          | ACD1-AS       | AAACCAGCAAGAACCAGTCG                                           |
| <i>Cloning MES16-GFP</i>                 |               |                                                                |
| <i>MES16</i>                             | MES16-SmaI-S  | TCCCCCGGGGAATGGGAGGAGAAGGTGGTGC                                |
|                                          | MES16-SpeI-AS | CCACTAGTTCGTTGAAGAAAAGAAACCGCAC                                |
| <i>Cloning MES18 in pProEX Hta</i>       |               |                                                                |
| <i>MES18</i>                             | MES9-EcoRI-S  | CCGAATTCATGAGTGAGCATCATTTTGTG                                  |
|                                          | MES9-EcoRI-AS | CCGAATTCTCAGGGAGAAAGAGATGAGG                                   |
| <i>Cloning PPH<sub>TP</sub>-MES16-HA</i> |               |                                                                |
| <i>PPH transit peptide</i>               | PPH_TP-S      | CGGAATTCATGGAGATAATCTCACTGAA                                   |
|                                          | PPH_TP-AS     | CACCTTCTCCTCCTCACTTCGAATCACAAGTC                               |
| <i>MES16</i>                             | MES16-S       | GATTCGAAGTGGAGGAGGAGAAGG-<br>TGTTGCTGA                         |
|                                          | MES16_HA-AS   | GAAGCTTTTAGGCATAGTCTGGGACGTCA-<br>TATGGATATCGTTGAAGAAAAGAAACCG |
